# 1 **Linking nitrogen load to the structure and function of wetland soil and** 2 **rhizosphere microbial communities**

3 Eric R Hester<sup>1\*</sup>, Sarah F. Harpenslager<sup>2,3</sup>, Josepha MH van Diggelen<sup>2,4</sup>, Leon L Lamers<sup>2</sup>, Mike SM  
4 Jetten<sup>1</sup>, Claudia Lüke<sup>1</sup>, Sebastian Lücker<sup>1</sup>, Cornelia U Welte<sup>1\*</sup>

5 <sup>1</sup>Department of Microbiology, Radboud University, Nijmegen, The Netherlands

6 <sup>2</sup>Department of Aquatic Ecology and Environmental Biology, Radboud University, Nijmegen, The  
7 Netherlands

8 <sup>3</sup>School of Biological and Chemical Sciences, Queen Mary University, London, United Kingdom

9 <sup>4</sup>B-WARE Research Centre, Nijmegen, The Netherlands

10

## 11 **\*Correspondence:**

12 Eric R Hester

13 e.hester@science.ru.nl

14

15 Cornelia U Welte

16 c.welte@science.ru.nl

17

18 **Keywords:** greenhouse gas, microbial community function, Opitutales, Acidobacteria,  
19 Sphingobacteriales, wetlands, *Juncus acutiflorus*, nitrogen

## 20 **Abstract**

21 Wetland ecosystems are important reservoirs of biodiversity and significantly contribute to emissions  
22 of the greenhouse gases CO<sub>2</sub>, N<sub>2</sub>O and CH<sub>4</sub>. High anthropogenic nitrogen (N) inputs from agriculture  
23 and fossil fuel combustion have been recognized as a severe threat to biodiversity and ecosystem  
24 functioning such as control of greenhouse gas emissions. Therefore it is important to understand how  
25 increased N input into pristine wetlands affects the composition and activity of micro-organisms,  
26 especially in interaction with dominant wetland plants. In a series of incubations analyzed over 90  
27 days, we disentangle the effects of N fertilization on the microbial community in bulk soil and the  
28 rhizosphere of *Juncus acutiflorus*, a common and abundant graminoid wetland plant. We observed an  
29 increase in greenhouse gas emissions when N is increased in incubations with *J. acutiflorus*,  
30 changing the system from a greenhouse gas sink to a source. Using 16S rRNA amplicon sequencing  
31 and metagenomics, we determined that the bacterial orders Opitutales, Subgroup-6 Acidobacteria and  
32 Sphingobacteriales significantly responded to high N availability and we hypothesize that these  
33 groups are contributing to the increased greenhouse gas emissions. These results indicated that  
34 increased N input leads to shifts in microbial activity within the rhizosphere, severely altering N  
35 cycling dynamics. Our study provides a framework for connecting environmental conditions of  
36 wetland bulk and rhizosphere soil to the structure and metabolic output of microbial communities.

37

## Nitrogen impacts on microbial function

### 38 Introduction

39 Wetlands are globally impacted by agricultural industry through the leaching of various nitrogen (N)  
40 forms such as nitrate ( $\text{NO}_3^-$ ), and by increased N deposition as a result of high N emissions from  
41 fossil fuel burning and agriculture (Galloway *et al.*, 2008). Furthermore, due to reduced oxidation  
42 under stagnant, waterlogged conditions, these systems show increased availability of ammonium  
43 ( $\text{NH}_4^+$ ) (Britto and Kronzucker, 2002). The strongly increased anthropogenic N input influences  
44 ecosystem degradation by contributing to biodiversity loss and altering (mostly increasing)  
45 greenhouse gas fluxes such as nitrous oxide ( $\text{N}_2\text{O}$ ), methane ( $\text{CH}_4$ ) and carbon dioxide ( $\text{CO}_2$ )  
46 (Bobbink *et al.*, 1998; Liu and Greaver, 2009; Van den Heuvel *et al.*, 2011; Soons *et al.*, 2016).

47 The abundance, composition and activity of micro-organisms strongly influence the biogeochemical  
48 cycling of wetland nutrients, particularly those resulting in emissions of greenhouse gases (Lamers *et al.*  
49 *et al.*, 2012; Philippot *et al.*, 2009). Specifically,  $\text{N}_2\text{O}$  emission may increase due to lowering of pH  
50 affecting the activity of incomplete denitrifiers (Brenzinger *et al.*, 2015; Van den Heuvel *et al.*, 2011;  
51 Liu and Greaver, 2009).  $\text{CH}_4$  emissions can increase due to competitive inhibition of the key enzyme  
52 of aerobic methanotrophs, methane monooxygenase (MMO), by elevated  $\text{NH}_4^+$ , osmotic stress of  
53 methanotrophs, or through the stimulation of methanogenic archaea (King and Schnell, 1998;  
54 Bodelier and Laanbroek, 2004; Dunfield and Knowles, 1995). Finally, the rate of soil C loss can  
55 increase as a result of N addition through the stimulation of heterotrophic respiration (Bragazza *et al.*,  
56 2006). Although it is well established that microbial processes are important drivers of ecosystem  
57 functions, such as controls on greenhouse gas emissions and nutrient cycling, there is a lack of  
58 understanding of how these functions are linked, both to the environmental conditions and to the  
59 composition of the microbial community (Philippot *et al.*, 2009).

60 Wetland plant roots influence the soil region surrounding the root, known as the rhizosphere, by  
61 altering the availability of oxygen, organic matter, and organic plant exudates (Smith and Delaune,  
62 1984; Abou Seada and Ottow, 1985; Bardgett and van der Putten, 2014). The total area of soil  
63 influenced by roots can be considerable, meaning that this definition of the rhizosphere may extend  
64 to the vast majority of the upper soil layer (Robinson *et al.*, 2003). The rhizosphere is an active,  
65 complex ecosystem where viruses, bacteria, archaea, fungi and protozoa interact with plant roots  
66 (Fierer *et al.*, 2007b). These microorganisms significantly contribute to nutrient cycling and  
67 ecosystem structure by channeling energy into higher trophic levels (reviewed in Curl & Harper  
68 1990; Hinsinger *et al.* 2009).

69 While the rhizosphere has been studied for decades, the effects of eutrophication on the plant-  
70 microbe interactions are of more recent interest. Specifically, it is of interest how N availability  
71 influence plant physiology and ultimately C and N cycling in the rhizosphere. On the global scale,  
72 soil microbial communities differ depending on the regional and local N regime; although, the  
73 diversity of these communities does not seem to vary much (Fierer *et al.*, 2012). Interestingly,  
74 variation in microbial community composition seems to be predictable based on local nutrient  
75 regimes (Leff *et al.*, 2015; Ramirez *et al.*, 2012). Even though these studies demonstrate the link  
76 between nutrient loading and community structure, they do not demonstrate how changes in the  
77 microbial community are functionally relevant to the ecosystem..

78 To build dynamic models of plant-microbe interactions, it is necessary to gain a robust understanding  
79 of the connection between environmental conditions (i.e., N availability) and microbial community  
80 structure and function (i.e., the bulk biological processes resulting in greenhouse gas emissions). In  
81 this study, we aimed at assessing the impact of increased N input into wetland systems on the

## Nitrogen impacts on microbial function

82 rhizosphere microbial community and its functions related to greenhouse gas production. To achieve  
83 this, we used *Juncus acutiflorus* (Sharp-flowered Rush), a very common graminoid plant in European  
84 wetlands that forms a dense vegetation and is known for radial oxygen loss from roots (ROL; Lamers  
85 et al. 2012). Furthermore, it has a high tolerance for increased N inputs (van Diggelen *et al.*, 2016).  
86 In a longitudinal study we determined greenhouse gas emissions increase as a result of N addition in  
87 incubations with *J. acutiflorus*, but not in incubations with only bulk wetland soil, under controlled  
88 stable experimental conditions. Additionally, functional responses were linked to shifts in the  
89 dominant members of the microbial community. We hypothesize that certain key microbial groups  
90 contribute to greenhouse gas emissions, either directly or indirectly through the food web. Our study  
91 takes the first steps toward a predictive understanding of microbial dynamics within the rhizosphere,  
92 linking nutrient load, microbial community structure and function.

## 93 **Materials and Methods**

### 94 **Sample Collection and experimental set up.**

95 Plants and sandy soil were sampled from the Ravenvenen (51.4399 N, 6.1961 E) in Limburg, The  
96 Netherlands (August, 2015) and returned to the Radboud University greenhouse facilities for  
97 conditioning. The Ravenvenen is a protected marshy area consisting of sandy soil, rich in vegetation  
98 with a high prevalence of *Juncus spp.* Plants were removed from soil, rhizomes were cut into eight  
99 2 cm fragments and reconditioned on hydroculture in a nutrient rich medium (as described in  
100 Hoagland & Arnon 1950). After sufficient root development (to approximately 25 cm after 2 weeks),  
101 eight plants and eight bulk soil incubations were randomly assigned to high or low nitrogen  
102 experimental groups (Supplementary table 1; Supplementary figure 1). Soil collected from the field,  
103 was homogenized and sieved to remove any contaminating roots and potted. The reconditioned  
104 plants were transferred to pots with a diameter of 19 cm at the base, 26 cm at the top and a height of  
105 19 cm containing the prepared soil, moved to an indoor water bath set to 15°C (cryostat, NESLAB,  
106 Thermoflex 1400, Breda, The Netherlands) and cultivated with a day/night cycle of 16 hours light  
107 and 8 hours dark (Master Son-T PiaPlus, Philips, Eindhoven, The Netherlands). Pots were kept  
108 waterlogged with a 2 cm water layer on top. A drip-percolation based system ensured a constant  
109 supply of nutrients. The low N input nutrient solution contained 12.5 µM NH<sub>4</sub>NO<sub>3</sub>, corresponding to  
110 an N loading rate of 40 kg N ha<sup>-1</sup> yr<sup>-1</sup>. The high N input solution contained 250 µM NH<sub>4</sub>NO<sub>3</sub>,  
111 corresponding to 800 kg N ha<sup>-1</sup> yr<sup>-1</sup>. These rates fall within N loading of wetlands in agricultural  
112 catchments, thus represent contrasting extremes (Verhoeven et al., 2006).

### 113 **Incubation measurements.**

114 Five representative *J. acutiflorus* specimens were harvested for initial measurements of plant dry  
115 weight, C:N ratios. At the final time point (T<sub>f</sub> = 90 days), all plants were harvested to measure dry  
116 weight and C:N ratios of roots, shoots and rhizomes. Pore water was extracted using 0.15 µm porous  
117 soil moisture samplers (SMS rhizons, Rhizosphere Research Products, Wageningen, The  
118 Netherlands) and measured over the course of the experiment to determine inorganic nutrients as well  
119 as metals using an Autoanalyzer (Autoanalyzer 3, Bran+Luebbe, Germany) and ICP-OES  
120 (iCAP6000, Thermo Scientific, Waltham, MA). To reduce the impact of soil heterogeneity, samples  
121 were extracted in duplicate and mean values were calculated.

### 122 **Greenhouse gas measurements.**

123 To determine greenhouse gas fluxes, a cylindrical transparent collection chamber (7.5 x 30cm) was  
124 used to measure accumulation or depletion of CO<sub>2</sub>, CH<sub>4</sub> and N<sub>2</sub>O in the headspace. CO<sub>2</sub> and CH<sub>4</sub>

## Nitrogen impacts on microbial function

125 fluxes were measured at  $T_m$  (45 days) and  $T_f$  and  $N_2O$  fluxes were measured at  $T_f$ . Fluxes were  
126 measured using a Picarro G2308 NIRS-CRD greenhouse gas analyzer (Picarro Inc., Santa Clara, CA,  
127 USA). Fluxes were determined by fitting a smoothed spline to the time series using the R function  
128 *sm.spline* from the *pspline* package and the average rate of change was calculated (Ramsay *et al.*,  
129 1997).

### 130 Denitrification potential.

131 To measure denitrification potential, two soil slurries were made from each experimental pot by  
132 mixing 50g soil with 100mL milliQ water, divided into control and experimental bottles and made  
133 anoxic by flushing with argon gas. Bottles were pre-incubated overnight at 15°C to allow for residual  
134 unlabeled  $NO_3^-$  to be consumed. A  $^{15}N$ -labeled  $NaNO_3$  solution was added to the experimental  
135 bottles to a final concentration of 500  $\mu M$  and a KCl solution was added to the control bottles to a  
136 final concentration of 500  $\mu M$ . Production of  $N_2O$  and  $N_2$  were measured by taking samples 2, 7 and  
137 22 h after adding substrate on a GC-MS (5975C, Agilent Technologies, Santa Clara, USA).

### 138 DNA extraction, 16S rRNA Amplicon and Metagenomic sequencing.

139 Soil was collected from three time points, one initial soil sample from the site, and  $T_m$  and  $T_f$  samples  
140 from each of the 16 incubations. A single core per pot was taken using a 1x7cm corer. DNA was  
141 extracted using the PowerSoil DNA Isolation Kit (MoBio, Carlsbad, CA, U.S.A.). 16S rRNA genes  
142 were amplified in triplicate reactions using IonTorrent sequencing adapter-barcoded primers 341F  
143 (CCATCTCATCCCTGCGTGTCTCCGACTCAGXXXXXXXXXXGATCCTACGGGNGGCWGCAG)  
144 and 785R  
145 (CCACTACGCCTCCGCTTTCCTCTCTATGGGCAGTCGGTGATGACTACHVGGGTATCTAA  
146 TCC) and pooled. The pooled amplicons were cleaned with Ampure beads (Beckman Coulter Inc.,  
147 Fullerton, USA) and subsequently prepared for sequencing on the IonTorrent PGM using the  
148 manufacturer's instructions (Life Technologies, Inc., Carlsbad, CA, USA).

149 From the same DNA samples, total DNA was sheared into approximately 400 bp fragments via  
150 sonication. Resulting fragments were prepared for sequencing following the manufacturer's  
151 instructions with the Ion Plus Fragment Library Kit (Life technologies, Carlsbad, CA). Raw reads  
152 were submitted to NCBI and archived under the SRA accession number SRP099838.

### 153 Data analysis.

154 16S rRNA gene amplicons were quality filtered using QIIME v1.9 (Caporaso *et al.*, 2010). Quality  
155 controlled reads were then clustered into OTUs at a 97% identify and phylogenetically classified by  
156 utilizing the NINJA-OPS v1.3 pipeline (Al-Ghalith *et al.*, 2016). The reference database used for  
157 taxonomic assignment was the SILVA database version 123 (Quast *et al.*, 2013). The resulting OTU  
158 table was used for downstream analysis in R (R Core Team, 2016). Count data was normalized to  
159 relative abundances to account for differing sequence depth between samples and a square root  
160 transformation was applied. The *vegan* R package was used to calculate Shannon diversity with the  
161 *diversity* function, Bray-Curtis dissimilarity matrices with the *vegdist* function, and to estimate  
162 compositional variance with the *betadisper* function (Oksanen *et al.*, 2015). Principal component  
163 analysis (PCA) was performed using the *princomp* function in R. The *RandomForest* R package was  
164 used for classification and regression (Liaw and Wiener, 2002). Linear models were fit with the *glm*  
165 function in the *stats* package. Metagenomic reads were quality filtered ( $Q > 25$ ) and small fragments  
166 ( $< 100bp$ ) were removed using PrinSeq (Schmieder and Edwards, 2011).

## Nitrogen impacts on microbial function

167 The metagenomic reads were compared to custom nitrogen and methane cycling protein databases  
168 and the NCBI nr databases with Diamond (Buchfink *et al.*, 2014; Lüke *et al.*, 2016). A bit score ratio  
169 (BSR) between the hit to the custom databases and to the NCBI nr database was used to identify false  
170 positives hits. A strict BSR of 0.85 was used as a cutoff. Gene abundances were normalized and  
171 expressed relative to the single copy RNA polymerase *rpoB* gene abundance. These relative values  
172 were then scaled for comparison within genes. Reads from all metagenomes were assembled using  
173 metaSPAdes (version 3.7; Bankevich *et al.* 2012) and resulting contigs were compared against all  
174 publicly available Bacteroidetes, Acidobacteria and Verrucomicrobia genomes in the NCBI database  
175 using Blastn. Furthermore, contigs were assessed for the presence of N or CH<sub>4</sub> cycling genes by  
176 comparing them with Diamond to the previously mentioned N and CH<sub>4</sub> cycling custom databases.

## 177 Results

### 178 Plant physiology

179 *J. acutiflorus* and bulk soil were incubated over a course of 90 days. The soil collected from the  
180 sampling site and used in the incubations was a sandy soil with low organic matter content. Soil  
181 samples were taken at an initial time point (T<sub>0</sub>), a mid-point (T<sub>m</sub>; t = 45 days) and final time point (T<sub>f</sub>;  
182 t = 90 days) (Supplementary Table 1). By T<sub>m</sub>, *J. acutiflorus* incubations had significant root  
183 development throughout the incubated soil, and as a result the rhizosphere was sufficiently sampled  
184 such that the soil sampled was clearly dominated by root biomass. To determine the N utilization of  
185 the plants and to identify growth responses to N inputs, the total dry weight biomass of roots,  
186 rhizomes and shoots and total N and C content of *J. acutiflorus* tissue were measured from plants at  
187 T<sub>f</sub>. Although there was no significant difference in total biomass and root:shoot ratio of *J. acutiflorus*  
188 between incubations, the average total N content of plant tissue was approximately twice as high (65  
189 mg g<sup>-1</sup>) in incubations with a high N input (t = 2.66; p = 0.037; Supplementary Table 2).  
190 Correspondingly, total C:N (averaged across the whole plant) was significantly higher in *J.*  
191 *acutiflorus* incubations with a low N input (t = -2.964; p = 0.009; Supplementary Table 2).  
192 Interestingly, this elevated C:N ratio was observed only for rhizome and shoot tissue, while the root  
193 C:N did not significantly differ between incubations (Supplementary Table 2).

### 194 Greenhouse gas fluxes

195 To link greenhouse gas fluxes with microbial community structure, gas flux measurements were  
196 performed at the same time points as soil sampling. Greenhouse gases were measured in both light  
197 and dark conditions, at T<sub>m</sub> and T<sub>f</sub> for CO<sub>2</sub> and CH<sub>4</sub>, and at T<sub>f</sub> for N<sub>2</sub>O (Figure 1). Bulk soils generally  
198 did not have significant greenhouse gas fluxes (fluxes were not significantly different from 0) and  
199 will not further be discussed here. In the *J. acutiflorus* incubations, CO<sub>2</sub> fluxes followed a day-night  
200 rhythm. Daytime CO<sub>2</sub> fluxes were generally negative, indicating net CO<sub>2</sub> fixation, with the largest  
201 rates significantly higher in high N *J. acutiflorus* incubations at T<sub>f</sub> (t = -5.28, p = 0.005; Figure 1A).  
202 Under dark conditions, CO<sub>2</sub> fluxes were positive only under the high N treatment while other  
203 treatments were not significantly different from 0 (t = 3.52, p = 0.01; Figure 1B). CH<sub>4</sub> and N<sub>2</sub>O  
204 emissions did not vary between dark and light conditions and therefore these conditions will not be  
205 compared. CH<sub>4</sub> fluxes increased from T<sub>m</sub> to T<sub>f</sub> and emissions tended to be highest in the *J.*  
206 *acutiflorus* incubations with a high N input, however there was large variability in this group (t =  
207 2.165; p = 0.064; Figure 1C). N<sub>2</sub>O emissions were highest in the high N treatment (t = 2.56, p = 0.04;  
208 Figure 1D), while a negative N<sub>2</sub>O flux was observed in *J. acutiflorus* incubations receiving a low N  
209 input (Figure 1D).

### 210 Denitrification potential

## Nitrogen impacts on microbial function

211 To understand how increased N input influenced N cycling within bulk and *J. acutiflorus* rhizosphere  
212 soils, soil slurries were taken at  $T_f$  and their denitrification potential was measured. There was  
213 significantly higher  $N_2O$  production from slurries originating from high N treatment soils ( $t = 2.41$ ;  $p$   
214  $= 0.045$ ; Supplementary Figure 2). There was no significant difference in the  $N_2$  production between  
215 high or low N treatments ( $t = 0.32$ ;  $p = 0.75$ ; Supplementary Figure 2). Additionally, the average  
216  $N_2:N_2O$  ratio was approximately 10 times higher in low N input slurries ( $5.36 \pm 7.39$ ;  $N_2:N_2O$   
217 production) as compared to high N slurries ( $0.58 \pm 0.61$ ), though not significantly different at  $p <$   
218  $0.05$  ( $t = -1.84$ ;  $p = 0.11$ ; Supplementary Figure 2).

### 219 Microbial community structure

220 The v3-v4 fragment of the 16S rRNA gene was amplified and sequenced resulting in, on average,  
221 over 1100 post-quality control (QC) sequences per sample. Each sample contained on average 264  
222  $\pm 136$  Operational Taxonomic Units (OTUs  $\pm$  s.d.). Rarefaction curves suggest that communities  
223 were sampled to capture the majority of the diversity (Supplementary Figure 3). Over the course of  
224 the incubation, the dominant microbial group changed (Figure 2A). Solibacteriales were most  
225 abundant at  $T_0$  and at  $T_m$ , but by  $T_f$  Rhizobiales became the prominent group (Figure 2B). On  
226 average, microbial diversity increased between  $T_m$  and  $T_f$ , ( $t = 2.516$ ;  $p = 0.0176$ ; Supplementary  
227 Figure 4A). Within each time point, diversity did not differ significantly between *J. acutiflorus* and  
228 bulk soil incubations, nor did N input have an impact (Supplementary Figure 4B+C). To assess how  
229 community composition varied across the different incubations, the Bray-Curtis dissimilarity index  
230 was used to calculate compositional differences between microbial communities. The compositional  
231 variation did not significantly vary between  $T_m$  and  $T_f$ , indicating that community variability did not  
232 change within the different experimental groups across time (Supplementary Figure 5A-C). The most  
233 variable communities were observed for low N *J. acutiflorus* incubations at  $T_m$ , which furthermore  
234 were significantly different from the low N input bulk soil incubations (Tukey's HSD;  $p = 0.0184$ ;  
235 Supplementary Figure 5B). At  $T_f$  there were no significant differences in community variation among  
236 bulk soil or *J. acutiflorus* incubations, or between low and high N loading. There were significant  
237 differences in overall community composition between high and low N treatment (PerMANOVA;  $p$   
238  $= 0.003$ ), rhizosphere and bulk soil ( $p = 0.02$ ), and midpoint and final time points ( $p < 0.001$ ).

### 239 Linking microbial community members to function

240 In order to understand how the microbial community members were linked to environmental  
241 conditions and greenhouse gas emissions, a random forest classifier was used to identify microbial  
242 taxa whose abundance was affected by N input, time of sampling or presence of *J. acutiflorus*.  
243 Additionally, random forest was also used for regression to determine connections between  
244 abundance of these groups and environmental conditions or greenhouse gas fluxes, and these  
245 associations were further analyzed by fitting linear models.

246 The top three microbial groups that significantly responded to N input were the Opitutales  
247 (Verrucomicrobia) and Sphingobacteriales (Bacteroidetes), which were more abundant in the high N  
248 treatment group, and G6 Acidobacteria, which were more abundant in in the low N treatment (Figure  
249 2B; Table 1). More specifically, the relative abundances of these three orders could be linked to  $N_2O$   
250 emissions (Table 1). Opitutales and Sphingobacteriales were positively associated with  $N_2O$  fluxes,  
251 while a negative association was observed for the G6-Acidobacteria. In addition, Sphingobacteriales  
252 were correlated to  $CO_2$  fixation (Table 1).

253 The top bacterial order distinguishing microbial communities from rhizosphere and bulk soil were  
254 the Alphaproteobacterial Caulobacterales, which were more abundant in the rhizosphere than in bulk

## Nitrogen impacts on microbial function

255 soil and had a negative association with elevated  $\text{NO}_3^-$  concentrations (Table 1). The Rhizobiales and  
256 Solibacterales orders of the Alphaproteobacteria class and Acidobacteria phylum, respectively, were  
257 most distinctive for the microbial communities sampled at  $T_m$  versus  $T_f$  (Figure 2; Table 1).  
258 Rhizobiales abundance was negatively associated with  $\text{CO}_2$  fluxes in dark conditions while the  
259 Solibacterales were correlated to pore water alkalinity, which is a proxy for anaerobic decomposition  
260 (Figure 2; Table 1).

### 261 Soil metagenomics

262 In addition to the 16S rRNA gene, which cannot be linked to functional genes on their own, total  
263 DNA was sequenced from 5 soils with representatives from  $T_0$ , and rhizosphere and bulk soil  
264 samples at  $T_m$  and  $T_f$  from the high N treatment. The goal of the metagenomic sampling was to  
265 survey the genetic potential of organisms that were most strongly influenced by N loading. In  
266 particular, we wanted to find support for the roles the taxa mentioned above have in the rhizosphere  
267 of *J. acutiflorus*. These libraries resulted in on average 1 million post-QC reads per library  
268 (Supplementary Table 3). Over 4.8 million soil metagenome reads were then assembled into 129,476  
269 contigs with a maximum length of 23kbp and a mean length of 597bp (+/- 368bp). Assembled  
270 contigs were compared to publicly available bacterial genomes from the Bacteroidetes,  
271 Verrucomicrobia and Acidobacterial phyla to identify genome fragments derived from the species  
272 identified in our previous analysis. Across all metagenomes, 5454 reads mapped to 145 contigs  
273 which had high identity to a Subgroup 6 Acidobacterial genome (CP015136.1; 84.5 +/- 7.1%  
274 identity), 6831 and 22 reads mapped to 352 and 5 contigs which aligned to an Opitutales  
275 (CP016094.1; 85.5 +/- 7.9% identity) and Sphingobacteriales (CP003349.1; 86.3 +/- 7.7% identity)  
276 genomes respectively (Supplementary Table 4).

277 In order to survey genetic potential for N and C cycling in N amended samples, custom databases of  
278 genes involved in N and C cycling processes (Lüke et al., 2016) were used to identify metagenomic  
279 reads of major N (*amoA* and *hao*, involved in  $\text{NH}_4^+$  oxidation; *narG*, *nirK*, *nirS*, *norB* and *nosZ*,  
280 involved in denitrification; *nrfA*, involved in dissimilatory nitrite reduction to ammonia; and *nifH*,  
281 involved in N fixation) and  $\text{CH}_4$  cycling genes (*pmoA* and *mmoX*, involved in  $\text{CH}_4$  oxidation; *phnGHI*  
282 and *mcrA*, involved in methanogenesis), and their abundance in the high N incubations  
283 (abbreviations found in Supplementary Table 5). There were no *nirS* detected in the dataset and only  
284 two reads annotated as *mcrA* were detected in the metagenomes from *J. acutiflorus*. All other N and  
285  $\text{CH}_4$  cycling genes were present.

### 286 Discussion

287 Greenhouse gas emissions remain a global challenge. A mechanistic understanding of the factors that  
288 alter microbial community structure and function, such as increased N input, is important in  
289 developing management strategies for greenhouse gas emissions. This is particularly important in  
290 ecosystems as extensive as wetlands. With an estimated area of up to 12.8 million  $\text{km}^2$  worldwide,  
291 wetlands considerably contribute to the total terrestrial carbon storage (Zedler and Kercher, 2005;  
292 Nahlik and Fennessy, 2016). Here we studied the impact of increased N input on the microbial  
293 community and greenhouse gas fluxes from the rhizosphere of *Juncus acutiflorus*, a very common  
294 plant in European wetland ecosystems, and a model for other *Juncus* species globally. We found  
295 characteristic shifts in the microbial community structure and a stimulation of greenhouse gas fluxes  
296 in *J. acutiflorus* incubations in response to N input.

### 297 Plant physiological shifts as a response to high N inputs.

## Nitrogen impacts on microbial function

298 The plant plays a prominent role in the maintenance of the rhizosphere microbial community  
299 (Reinhold-Hurek *et al.*, 2015). Roots release oxygen through radial oxygen loss providing an oxic  
300 niche in otherwise anoxic wetland soils (Armstrong, 1971). Plants also release labile organic matter  
301 in the form of organic acids, neutral sugars and amino acids (Kamilova *et al.*, 2006; Jones, 1998).  
302 The composition of this organic matter structures the microbial community within the rhizosphere by  
303 providing different substrates for heterotrophic micro-organisms (Haichar *et al.*, 2008). The exuded  
304 organic acids also acidify the surrounding soil, preventing many microbial species from thriving  
305 within the rhizosphere, but also modifying nutrient availability (Marschner *et al.*, 1987; Petersen and  
306 Böttger, 1991). The quantity of organic matter released is closely associated with photosynthesis  
307 rates. As plants are often N limited in natural systems, relieving this limitation promotes plant growth  
308 (Reich *et al.*, 2006). In this study we observed that when incubated under high N input *J. acutiflorus*  
309 showed increased C fixation rates (Figure 1A) and plant tissue becomes saturated with N  
310 (Supplementary Table 2). This also suggests that *J. acutiflorus* without N limitation excretes larger  
311 amounts of labile carbon into the surrounding soil, which is also evident from the observed decreases  
312 in pore water pH in the high N incubations (Supplementary Figure 6). Additionally, due to root  
313 derived oxygen, increased nitrification rates could contribute to this observed drop in pH (Lamers *et*  
314 *al.* 2012). Together, higher N input could result in higher photosynthetic rates in *J. acutiflorus*  
315 specimens, likely depositing larger amounts of organic matter into surrounding soil, stimulating the  
316 heterotrophic microbial community in return (Figure 2; Figure 3).

### 317 Greenhouse gas fluxes as a result of high N input.

318 N availability has been shown to alter greenhouse gas emission dynamics in previous studies  
319 (Philippot *et al.*, 2009). Here we observed that greenhouse gas fluxes in *J. acutiflorus* incubations  
320 were stimulated as a response to increased N input (Figure 1). CO<sub>2</sub> fixation rates were highest in *J.*  
321 *acutiflorus* incubations with high N input in the light conditions, likely due to increased  
322 photosynthetic activity of the plant and photosynthetic microorganisms. In the dark, the same *J.*  
323 *acutiflorus* incubations showed elevated CO<sub>2</sub> emissions, likely due to increased plant and microbial  
324 respiration (Figure 1).

325 In this study, the highest CH<sub>4</sub> emissions were observed in *J. acutiflorus* incubations with high N  
326 input, although with high variability (Figure 1C). Still, the elevated emission rates suggest that the *J.*  
327 *acutiflorus* rhizosphere could become a net source of CH<sub>4</sub> under high N input. The total amount of  
328 CH<sub>4</sub> released reflects the sum of CH<sub>4</sub> production (methanogenesis) and consumption  
329 (methanotrophy). Methanogenesis has been linked to plant productivity, thought to be due to  
330 increased availability of labile organic carbon from photosynthate exudates (Whiting and Chanton,  
331 1993; Aulakh *et al.*, 2001). Furthermore, methanogens can be stimulated through an indirect priming  
332 mechanism. Labile organic matter from plant photosynthate can stimulate microbial activity  
333 responsible for degrading recalcitrant organic matter, which in turn makes this carbon source  
334 available to methanogens (Jenkinson *et al.*, 1985; Kotsyurbenko, 2005; Kotsyurbenko *et al.*, 1993;  
335 Tveit *et al.*, 2015). Alternatively, net CH<sub>4</sub> emissions can be increased by inhibiting CH<sub>4</sub>  
336 consumption, for instance through the competitive inhibition of the key enzyme methane  
337 monooxygenase by NH<sub>4</sub><sup>+</sup> (Bosse *et al.*, 1993; Conrad and Rothfuss, 1991).

338 The reduction of NO<sub>x</sub> to N<sub>2</sub> is often incomplete, resulting in the production of the greenhouse gas  
339 N<sub>2</sub>O. Incomplete denitrification occurs when microbial species do not utilize N<sub>2</sub>O as an electron  
340 acceptor either due to physiological constraints or induced by certain environmental conditions  
341 (Philippot, 2002; Wallenstein *et al.*, 2006). It has been observed that N fertilization has the largest  
342 impact on N<sub>2</sub>O emissions when considering all terrestrial ecosystems, with NO<sub>3</sub><sup>-</sup> availability being



## Nitrogen impacts on microbial function

343 the main driver (Liu and Greaver, 2009). As denitrification is largely a microbial process, the  
344 composition of the microbial community plays an important role in the total amount of N emitted  
345 from soils. Representatives from a diverse set of phyla are known to denitrify (Philippot, 2002;  
346 Philippot *et al.*, 2009) and denitrification rates are therefore considered to be robust to changes in the  
347 microbial community composition (Enwall *et al.*, 2005). Here we observed elevated N<sub>2</sub>O emissions  
348 in *J. acutiflorus* incubations under high N input, whereas there were negative N<sub>2</sub>O fluxes in the low  
349 N incubations. Interestingly, N<sub>2</sub>O emissions by bulk soil were not significantly influenced by the  
350 tested N regimes, indicating that *J. acutiflorus* plays a substantial role in stimulating N reducing  
351 microbial species, probably by supplying labile carbon. In addition there was an almost 10-fold shift  
352 in the release of N<sub>2</sub>O relative to N<sub>2</sub> as a response to N input suggesting a high N input can shift the  
353 community towards partial denitrifiers in the rhizosphere, which is important given the strong  
354 greenhouse potential of N<sub>2</sub>O.

### 355 Shifts in microbial community structure as a response to high N input.

356 Associating microbial metabolisms (i.e., those resulting in greenhouse gas emission) to the structure  
357 of microbial communities and abiotic factors defined by the environment is essential to predict how  
358 the structure and function of these microbial ecosystems may adapt to future conditions. Bulk and  
359 rhizosphere soils contain diverse microbial communities with equally diverse metabolisms (Philippot  
360 *et al.*, 2013; Torsvik and Øvreås, 2002). It remains a challenge to understand the role that key groups  
361 play in these systems, and how they affect their environment.

362 We link the abundance of three bacterial orders to N input and greenhouse gas emissions (Figure 2;  
363 Table 1). The Verrucomicrobial Optitutales were associated with high N input and elevated N<sub>2</sub>O  
364 emissions. Members of this order are diversely associated with different rhizospheres, ranging from  
365 sugar cane to wetland plants (Dedysh *et al.*, 2006; van Passel *et al.*, 2011). They have been  
366 physiologically described as anaerobic polysaccharide utilizing bacteria that are capable of reducing  
367 NO<sub>3</sub><sup>-</sup> to NO<sub>2</sub><sup>-</sup> (Chin *et al.*, 2001). Apart from the O<sub>2</sub> derived from the plant roots, which is quickly  
368 consumed by aerobic heterotrophs, wetland soils are waterlogged systems resulting in an anoxic  
369 environment. Assembled sequences from the metagenomes obtained in this study aligned to an  
370 Optitutales genome (CP016094.1), which encodes NO<sub>3</sub><sup>-</sup> and NO<sub>2</sub><sup>-</sup> reductases. Additionally, two of  
371 our assembled contigs contained open reading frames for the copper-containing nitrite reductase  
372 (NirK). It is likely that members of this order are utilizing plant derived organic matter as their  
373 electron donor and NO<sub>3</sub><sup>-</sup> as their electron acceptor (Figure 3).

374 The Sphingobacteriales from the phylum Bacteroidetes were also overrepresented in the high N input  
375 incubations (Figure 2; Table 1). Sphingobacteriales are understood as copiotrophic bacteria, referring  
376 to their ability to metabolize a wide array of carbon sources and being present at high abundances in  
377 soils with high carbon availability (Fierer *et al.*, 2007b; Padmanabhan *et al.*, 2003). In the current  
378 study, the majority of organic matter would originate from the plant as the sandy soil used had low  
379 organic matter content. Rhizodeposition in this case would be very important to groups such as  
380 Sphingobacteriales, not only as a carbon source but as an O<sub>2</sub> source as Sphingobacteriales seem to be  
381 particularly sensitive to O<sub>2</sub> availability. When tested for cellulolytic activity in oxic or anoxic  
382 environments they were exclusively active in the oxic treatment, suggesting that this group may  
383 require oxygenated environments for carbon degradation (Schellenberger *et al.*, 2009). Here,  
384 Sphingobacteriales were more abundant in high N input incubations and were associated with N<sub>2</sub>O  
385 fluxes and higher CO<sub>2</sub> fixation rates, suggesting that they may benefit from oxygen and carbon  
386 derived from roots. In addition, multiple contigs from the soil metagenomes aligned to a  
387 Sphingobacteriales genome (CP003349.1), which encodes nitrate, nitrite, nitric oxide and nitrous

## Nitrogen impacts on microbial function

388 oxide reductases. Three of these contigs encoded NirKs homologous to one found in a  
389 Sphingobacteriales genome (LGEL01000245.1). Considering findings from this study and the  
390 literature, we hypothesize that Sphingobacteriales within the *J. acutiflorus* rhizosphere could be  
391 facultative anaerobes benefiting from the elevated carbon input from the roots and utilizing available  
392 NO<sub>x</sub> as electron acceptors (Figure 3).

393 G6 Acidobacteria were overrepresented in the low N input incubations and there was no significant  
394 difference in their abundance between bulk and rhizosphere soils. Unlike Opitutales and  
395 Sphingobacteriales, they were negatively correlated with N<sub>2</sub>O emissions (Figure 2; Table 1). While  
396 the G6 Acidobacteria group is not well studied, one genome (CP015136.1) was recently published  
397 (Huang *et al.*, 2016) and was shown to contain nitric and nitrous oxide reductases. 145 contigs of our  
398 metagenome aligned to this genome; however none of the assembled contigs encoded proteins  
399 involved in denitrification. Genomic and physiological studies of a closely related group (group 1  
400 Acidobacteria) showed that they were anaerobic organoheterotrophs capable of utilizing NO<sub>3</sub><sup>-</sup> for  
401 respiration and NH<sub>4</sub><sup>+</sup> as an N source (Dedysh *et al.*, 2012), and other Acidobacteria have also been  
402 described as important soil carbon and N cyclers. However, many N-cycling reactions are restricted  
403 to particular clades indicating that these functions are heterogeneously represented across the  
404 Acidobacteria phylum (Kielak *et al.*, 2016; Koch *et al.*, 2008). Alternatively, Acidobacteria can utilize  
405 C derived from autotrophic microorganisms in anoxic environments (Meisinger *et al.*, 2007). They  
406 have been reported to utilize various plant and microbe-derived polysaccharides, like xylan,  
407 cellobiose and gellan (Janssen *et al.*, 2002; Koch *et al.*, 2008) and thrive in various soils and  
408 rhizospheres, including anoxic soils with low pH (Fierer *et al.*, 2007a; Pankratov and Dedysh, 2010).  
409 The cultured representatives of Acidobacteria have low growth rates and appear to be adapted to  
410 oligotrophic environments (Fierer *et al.* 2007; Jones *et al.* 2009). Thus, G6 Acidobacteria may not be  
411 competitive under high N availability by fast-growing (partial) denitrifiers. Together, the G6-  
412 Acidobacteria may be involved in anaerobic degradation of organic carbon from autotrophic bacteria  
413 or plant biomass, and increased N availability might reduce this group's abundance (Figure 3).

### 414 **A model microbial food web within bulk soil and the *J. acutiflorus* rhizosphere.**

415 Increased N input poses a distinct threat to wetland ecosystems, contributing to the degradation of  
416 biodiversity and altering greenhouse gas emissions (Bobbink *et al.*, 1998; Philippot *et al.*, 2009).  
417 Plants, such as *J. acutiflorus*, influence the abundance and composition of micro-organisms living in  
418 the rhizosphere by exuding organic matter and releasing oxygen from their roots (Reinhold-Hurek *et al.*  
419 *et al.*, 2015). In the current study, N addition resulted in increased productivity of *J. acutiflorus*,  
420 stimulating the effect of the plant on the microbial community but also directly affecting microbial  
421 metabolism. Based on our observations and published knowledge, we built a model of the *J.*  
422 *acutiflorus* microbial food web indicating how N input impacts the soil microbial community (Figure  
423 3).

424 N fertilization can directly influence the soil microbial community by providing excess NH<sub>4</sub><sup>+</sup> and  
425 NO<sub>3</sub><sup>-</sup>. Previous studies have shown that *J. acutiflorus* prefers NH<sub>4</sub><sup>+</sup> over NO<sub>3</sub><sup>-</sup> as N source, leading to  
426 a surplus of NO<sub>3</sub><sup>-</sup> in the rhizosphere (Supplementary Figure 6; van Diggelen *et al.* 2016). This alters  
427 N cycling dynamics, favoring microbial species capable of rapidly reducing NO<sub>3</sub><sup>-</sup> to N<sub>2</sub>O rather than  
428 to N<sub>2</sub>. While complete denitrification supports higher growth yields, it also is energetically more  
429 costly and thus unfavorable under lower nutrient availability (i.e., K strategy life style). The  
430 combined effect of enhanced plant derived carbon input and higher N availability stimulates  
431 heterotrophic activity, resulting in increased N<sub>2</sub>O and CO<sub>2</sub> emissions (Figure 3). While excess NO<sub>3</sub><sup>-</sup>  
432 spurs anaerobic respiration, increased NH<sub>4</sub><sup>+</sup> concentrations can lead to an inhibition of methane

## Nitrogen impacts on microbial function

433 oxidation, possibly contributing to the heterogeneity observed in CH<sub>4</sub> emissions (Figure 1C). High N  
434 availability can also have an indirect effect by influencing plant physiology. The observed increased  
435 rates of carbon fixation by *J. acutiflorus* under high N input may result in augmented release of  
436 organic matter (including organic acids) and oxygen from the roots. This acidifies the rhizosphere  
437 soil, which can alter the activity of *nosZ* containing microbes (Liu *et al.*, 2014). Additionally,  
438 elevated oxygen availability stimulates heterotrophic activity in an otherwise anoxic environment,  
439 leading to higher CO<sub>2</sub> emissions. Thus, altered N input in the *J. acutiflorus* rhizosphere leads to  
440 increased greenhouse gas fluxes directly by altering the abundance of N-cycling species and  
441 indirectly through the stimulation of plant primary productivity (Figure 3).

## 442 CONCLUSIONS

443 With continued anthropogenic inputs of nitrogen into wetlands, it is critical to mechanistically  
444 understand how this activity may affect globally relevant carbon and nitrogen cycling within  
445 wetlands. The results here support that under high N input, greenhouse gas emissions from the *J.*  
446 *acutiflorus* rhizosphere increase, shifting the system from a greenhouse gas sink to a source. Three  
447 bacterial orders, the Opitutales, G6-Acidobacteria and Sphingobacteriales, respond to increased N  
448 availability and genomic evidence supports their involvement in processes leading to changes in  
449 greenhouse gas fluxes. Our view is that understanding interactions within the rhizosphere, that result  
450 in increased greenhouse gas emissions, is essential for creating management solutions aimed to  
451 address greenhouse gas emission goals, efficient agricultural practices, and conservation efforts. To  
452 move forward in our understanding of the complex dynamics within ecosystems such as the  
453 rhizosphere, future effort needs to be made in building extensive datasets that can be used to build  
454 predictive models of how these microbial ecosystems might respond under altered environmental  
455 conditions. We propose that mechanistic models, such as our *J. acutiflorus* rhizosphere plant-  
456 microbial food web model, should be used to set the framework for building such datasets.

## 457 Acknowledgements

458 We would like to thank Theo van Allen for sequencing support and Sebastian Krosse, Paul van der  
459 Ven, and General Instrumentation at Radboud University for support with elemental analysis.  
460 Funding was provided by the European Research Council (ERC AG 339880 ECOMOM) to  
461 M.S.M.J., and the Netherlands Organisation for Scientific Research (NOW) through Gravitation  
462 Grants SIAM (024.002.002), and NESSC (024.002.001) to M.S.M.J. and VENI grant 863.14.019 to  
463 S.L..

## 464 Author Contributions

465 EH, SFH, JvD, LL, MJ, CL, SL, CW designed research; EH, SFH, JvD performed research; EH,  
466 SFH, JvD analyzed data; EH, SL, CW wrote the paper; All authors reviewed and agreed with the  
467 final version of the manuscript.

## 468 Conflict of Interest

469 The authors declare no conflicts of interest.

## 470 Funding

471 This work was supported by the European Research Council (ERC AG 339880 ECOMOM) to  
472 M.S.M.J., and the Netherlands Organisation for Scientific Research (N.W.O) through Gravitation

## Nitrogen impacts on microbial function

473 Grants SIAM (024.002.002) and NESSC (024.002.001) to M.S.M.J. and VENI grant 863.14.019 to  
474 S.L..

### 475 References

476 Abou Seada MNI, Ottow JCG. (1985). Effect of increasing oxygen concentration on total  
477 denitrification and nitrous oxide release from soil by different bacteria. *Biol Fertil Soils* **1**: 31–38.

478 Al-Ghalith GA, Montassier E, Ward HN, Knights D. (2016). NINJA-OPS: Fast accurate marker gene  
479 alignment using concatenated ribosomes. *PLoS Comput Biol* **12**: e1004658.

480 Armstrong W. (1971). Radial oxygen losses from intact rice roots as affected by distance from the  
481 apex, respiration and waterlogging. *Physiol Plant* **25**: 192–197.

482 Aulakh MS, Wassmann R, Bueno C, Rennenberg H. (2001). Impact of root exudates of different  
483 cultivars and plant development stages of rice (*Oryza sativa* L.) on methane production in a paddy  
484 soil. *Plant Soil* **230**: 77–86.

485 Bankevich A, Nurk S, Antipov D, Gurevich AA, Dvorkin M, Kulikov AS, *et al.* (2012). SPAdes: A  
486 new genome assembly algorithm and Its applications to single-cell sequencing. *J Comput Biol* **19**:  
487 455–477.

488 Bardgett RD, van der Putten WH. (2014). Belowground biodiversity and ecosystem functioning.  
489 *Nature* **515**: 505–511.

490 Bobbink R, Hornung M, Roelofs JGM. (1998). The effects of air-borne nitrogen pollutants on species  
491 diversity in natural and semi-natural European vegetation. *J Ecol* **86**: 717–738.

492 Bodelier PLE, Laanbroek HJ. (2004). Nitrogen as a regulatory factor of methane oxidation in soils  
493 and sediments. *FEMS Microbiol Ecol* **47**.

494 Bosse U, Frenzel P, Conrad R. (1993). Inhibition of methane oxidation by ammonium in the surface  
495 layer of a littoral sediment. *FEMS Microbiol Ecol* **13**.

496 Bragazza L, Freeman C, Jones T, Rydin H, Limpens J, Fenner N, *et al.* (2006). Atmospheric nitrogen  
497 deposition promotes carbon loss from peat bogs. *Proc Natl Acad Sci U S A* **103**: 19386–19389.

498 Brenzinger K, Dörsch P, Braker G. (2015). PH-driven shifts in overall and transcriptionally active  
499 denitrifiers control gaseous product stoichiometry in growth experiments with extracted bacteria from  
500 soil. *Front Microbiol* **6**: 961.

501 Britto DT, Kronzucker HJ. (2002). NH<sub>4</sub><sup>+</sup> toxicity in higher plants: a critical review. *J Plant Physiol*  
502 **159**: 567–584.

503 Buchfink B, Xie C, Huson DH. (2014). Fast and sensitive protein alignment using DIAMOND. *Nat*  
504 *Methods* **12**: 59–60.

505 Caporaso J, Kuczynski J, Stombaugh J. (2010). QIIME allows analysis of high-throughput  
506 community sequencing data. *Nat Methods* **7**: 335–336.

507 Chin KJ, Liesack W, Janssen PH. (2001). *Opiritatus terrae* gen. nov., sp. nov., to accommodate novel

## Nitrogen impacts on microbial function

- 508 strains of the division ‘Verrucomicrobia’ isolated from rice paddy soil. *Int J Syst Evol Microbiol* **51**:  
509 1965–1968.
- 510 Conrad R, Rothfuss F. (1991). Methane oxidation in the soil surface layer of a flooded rice field and  
511 the effect of ammonium. *Biol Fertil Soils* **12**: 28–32.
- 512 Curl EA, Harper JD. (1990). Fauna-microflora interactions. In: *The rhizosphere*. pp 369–388.
- 513 Dedysh SN, Kulichevskaya IS, Serkebaeva YM, Mityaeva MA, Sorokin V V., Suzina NE, *et al.*  
514 (2012). *Bryocella elongata* gen. nov., sp. nov., a member of subdivision 1 of the Acidobacteria  
515 isolated from a methanotrophic enrichment culture, and emended description of *Edaphobacter*  
516 *aggregans* Koch *et al.* 2008. *Int J Syst Evol Microbiol* **62**: 654–664.
- 517 Dedysh SN, Pankratov TA, Belova SE, Kulichevskaya IS, Liesack W. (2006). Phylogenetic analysis  
518 and in situ identification of bacteria community composition in an acidic Sphagnum peat bog. *Appl*  
519 *Environ Microbiol* **72**: 2110–2117.
- 520 van Diggelen JMH, Smolders AJP, Visser EJW, Hicks S, Roelofs JGM, Lamers LPM. (2016).  
521 Differential responses of two wetland graminoids to high ammonium at different pH values  
522 Hawkesford M (ed). *Plant Biol* **18**: 307–315.
- 523 Dunfield P, Knowles R. (1995). Kinetics of inhibition of methane oxidation by nitrate, nitrite, and  
524 ammonium in a humisol. *Appl Environ Microbiol* **61**: 3129–3135.
- 525 Enwall K, Philippot L, Hallin S. (2005). Activity and composition of the denitrifying bacterial  
526 community respond differently to long-term fertilization. *Appl Environ Microbiol* **71**: 8335–8343.
- 527 Fierer N, Bradford MA, Jackson RB. (2007a). Toward an ecological classification of soil bacteria.  
528 *Ecology* **88**: 1354–1364.
- 529 Fierer N, Breitbart M, Nulton J, Salamon P, Lozupone C, Jones R, *et al.* (2007b). Metagenomic and  
530 small-subunit rRNA analyses reveal the genetic diversity of bacteria, archaea, fungi, and viruses in  
531 soil. *Appl Environ Microbiol* **73**: 7059–7066.
- 532 Fierer N, Lauber CL, Ramirez KS, Zaneveld J, Bradford MA, Knight R. (2012). Comparative  
533 metagenomic, phylogenetic and physiological analyses of soil microbial communities across nitrogen  
534 gradients. *ISME J* **6**: 1007–1017.
- 535 Galloway JN, Townsend AR, Erisman JW, Bekunda M, Cai Z, Freney JR, *et al.* (2008).  
536 Transformation of the Nitrogen Cycle: Recent Trends, Questions, and Potential Solutions. *Science*  
537 (80- ) **320**: 889–892.
- 538 Haichar F el Z, Marol C, Berge O, Rangel-Castro JI, Prosser JI, Balesdent J, *et al.* (2008). Plant host  
539 habitat and root exudates shape soil bacterial community structure. *ISME J* **2**: 1221–1230.
- 540 Van den Heuvel RN, Bakker SE, Jetten MSM, Hefting MM. (2011). Decreased N<sub>2</sub>O reduction by  
541 low soil pH causes high N<sub>2</sub>O emissions in a riparian ecosystem. *Geobiology* **9**: 294–300.
- 542 Hinsinger P, Bengough AG, Vetterlein D, Young IM. (2009). Rhizosphere: biophysics,  
543 biogeochemistry and ecological relevance. *Plant Soil* **321**: 117–152.

## Nitrogen impacts on microbial function

- 544 Hoagland DR, Arnon DI. (1950). The water-culture method for growing plants without soil. *Calif*  
545 *Agric Exp Stn Circ* **347**: 1–32.
- 546 Huang S, Vieira S, Bunk B, Riedel T, Spröer C, Overmann J. (2016). First Complete Genome  
547 Sequence of a Subdivision 6 Acidobacterium Strain. *Genome Announc* **4**: e00469-16.
- 548 Janssen PH, Yates PS, Grinton BE, Taylor PM, Sait M. (2002). Improved culturability of soil  
549 bacteria and isolation in pure culture of novel members of the divisions Acidobacteria,  
550 Actinobacteria, Proteobacteria, and Verrucomicrobia. *Appl Environ Microbiol* **68**: 2391–2396.
- 551 Jenkinson DS, Fox RH, Rayner JH. (1985). Interactions between fertilizer nitrogen and soil  
552 nitrogen—the so-called ‘priming’ effect. *J Soil Sci* **36**: 425–444.
- 553 Jones DL. (1998). Organic acids in the rhizosphere – a critical review. *Plant Soil* **205**: 25–44.
- 554 Jones RT, Robeson MS, Lauber CL, Hamady M, Knight R, Fierer N. (2009). A comprehensive  
555 survey of soil acidobacterial diversity using pyrosequencing and clone library analyses. *ISME J* **3**:  
556 442–453.
- 557 Kamilova F, Kravchenko L V., Shaposhnikov AI, Azarova T, Makarova N, Lugtenberg B. (2006).  
558 Organic acids, sugars, and l-Tryptophane in exudates of vegetables growing on stonewool and their  
559 effects on activities of rhizosphere bacteria. *Mol Plant-Microbe Interact* **19**: 250–256.
- 560 Kielak AM, Barreto CC, Kowalchuk GA, van Veen JA, Kuramae EE. (2016). The ecology of  
561 Acidobacteria: moving beyond genes and genomes. *Front Microbiol* **7**: 744.
- 562 King GM, Schnell S. (1998). Effects of ammonium and non-ammonium salt additions on methane  
563 oxidation by *Methylosinus trichosporium* OB3b and maine forest soils. *Appl Environ Microbiol* **64**:  
564 253–257.
- 565 Koch IH, Gich F, Dunfield PF, Overmann J. (2008). *Edaphobacter modestus* gen. nov., sp. nov., and  
566 *Edaphobacter aggregans* sp. nov., acidobacteria isolated from alpine and forest soils. *Int J Syst Evol*  
567 *Microbiol* **58**: 1114–1122.
- 568 Kotsyurbenko OR. (2005). Trophic interactions in the methanogenic microbial community of low-  
569 temperature terrestrial ecosystems. *FEMS Microbiol Ecol* **53**: 3–13.
- 570 Kotsyurbenko OR, Nozhevnikova AN, Zavarzin GA. (1993). Methanogenic degradation of organic  
571 matter by anaerobic bacteria at low temperature. *Chemosphere* **27**: 1745–1761.
- 572 Lamers LPM, van Diggelen JMH, Op den Camp HJM, Visser EJW, Lucassen ECHET, Vile MA, *et*  
573 *al.* (2012). Microbial transformations of nitrogen, sulfur, and iron dictate vegetation composition in  
574 wetlands: a review. *Front Microbiol* **3**: 156.
- 575 Leff JW, Jones SE, Prober SM, Barberán A, Borer ET, Firn JL, *et al.* (2015). Consistent responses of  
576 soil microbial communities to elevated nutrient inputs in grasslands across the globe. *Proc Natl Acad*  
577 *Sci U S A* **112**: 10967–10972.
- 578 Liaw A, Wiener M. (2002). Classification and regression by randomForest. *R news* **2**: 18–22.
- 579 Liu B, Frostegård Å, Bakken LR. (2014). Impaired reduction of N<sub>2</sub>O to N<sub>2</sub> in acid soils is due to a

## Nitrogen impacts on microbial function

- 580 posttranscriptional interference with the expression of *nosZ*. *MBio* **5**: e01383-14.
- 581 Liu L, Greaver TL. (2009). A review of nitrogen enrichment effects on three biogenic GHGs: the  
582 CO<sub>2</sub> sink may be largely offset by stimulated N<sub>2</sub>O and CH<sub>4</sub> emission. *Ecol Lett* **12**: 1103–1117.
- 583 Lüke C, Speth DR, Kox MAR, Villanueva L, Jetten MSM. (2016). Metagenomic analysis of nitrogen  
584 and methane cycling in the Arabian Sea oxygen minimum zone. *PeerJ* **4**: e1924.
- 585 Marschner H, Romheld V, Cakmak I. (1987). Root-induced changes of nutrient availability in the  
586 rhizosphere. *J Plant Nutr* **10**: 1175–1184.
- 587 Meisinger DB, Zimmermann J, Ludwig W, Schleifer K-H, Wanner G, Schmid M, *et al.* (2007). In  
588 situ detection of novel Acidobacteria in microbial mats from a chemolithoautotrophically based cave  
589 ecosystem (Lower Kane Cave, WY, USA). *Environ Microbiol* **9**: 1523–1534.
- 590 Nahlik AM, Fennessy MS. (2016). Carbon storage in US wetlands. *Nat Commun* **7**: 13835.
- 591 Oksanen J, Blanchet FG, Kindt R. (2015). Vegan Package.
- 592 Padmanabhan P, Padmanabhan S, DeRito C, Gray A, Gannon D, Snape JR, *et al.* (2003). Respiration  
593 of <sup>13</sup>C-labeled substrates added to soil in the field and subsequent 16S rRNA gene analysis of <sup>13</sup>C-  
594 labeled soil DNA. *Appl Environ Microbiol* **69**: 1614–1622.
- 595 Pankratov TA, Dedysh SN. (2010). *Granulicella paludicola* gen. nov., sp. nov., *Granulicella*  
596 *pectinivorans* sp. nov., *Granulicella aggregans* sp. nov. and *Granulicella rosea* sp. nov., acidophilic,  
597 polymer-degrading acidobacteria from Sphagnum peat bogs. *Int J Syst Evol Microbiol* **60**: 2951–  
598 2959.
- 599 van Passel MWJ, Kant R, Palva A, Copeland A, Lucas S, Lapidus A, *et al.* (2011). Genome sequence  
600 of the verrucomicrobium *Opitutus terrae* PB90-1, an abundant inhabitant of rice paddy soil  
601 ecosystems. *J Bacteriol* **193**: 2367–2368.
- 602 Petersen W, Böttger M. (1991). Contribution of organic acids to the acidification of the rhizosphere  
603 of maize seedlings. *Plant Soil* **132**: 159–163.
- 604 Philippot L. (2002). Denitrifying genes in bacterial and Archaeal genomes. *Biochim Biophys Acta -*  
605 *Gene Struct Expr* **1577**: 355–376.
- 606 Philippot L, Hallin S, Börjesson G, Baggs EM. (2009). Biochemical cycling in the rhizosphere  
607 having an impact on global change. *Plant Soil* **321**: 61–81.
- 608 Philippot L, Raaijmakers JM, Lemanceau P, van der Putten WH. (2013). Going back to the roots: the  
609 microbial ecology of the rhizosphere. *Nat Rev Microbiol* **11**: 789–799.
- 610 Quast C, Pruesse E, Yilmaz P, Gerken J, Schweer T, Yarza P, *et al.* (2013). The SILVA ribosomal  
611 RNA gene database project: improved data processing and web-based tools. *Nucleic Acids Res* **41**:  
612 D590-D596.
- 613 R Core Team. (2016). R: A language and environment for statistical computing. *R Found Stat*  
614 *Comput Vienna, Austria*. e-pub ahead of print, doi: 10.1038/sj.hdy.6800737.

## Nitrogen impacts on microbial function

- 615 Ramirez KS, Craine JM, Fierer N. (2012). Consistent effects of nitrogen amendments on soil  
616 microbial communities and processes across biomes. *Glob Chang Biol* **18**: 1918–1927.
- 617 Ramsay JO, Heckman N, Silverman BW. (1997). Spline smoothing with model-based penalties.  
618 *Behav Res Methods, Instruments, Comput* **29**: 99–106.
- 619 Reich PB, Hobbie SE, Lee T, Ellsworth DS, West JB, Tilman D, *et al.* (2006). Nitrogen limitation  
620 constrains sustainability of ecosystem response to CO<sub>2</sub>. *Nature* **440**: 922–925.
- 621 Reinhold-Hurek B, Büniger W, Burbano CS, Sabale M, Hurek T. (2015). Roots Shaping Their  
622 Microbiome: Global Hotspots for Microbial Activity. *Annu Rev Phytopathol* **53**: 403–424.
- 623 Robinson D, Hodge A, Fitter A. (2003). Constraints on the form and function of root systems. In:  
624 Springer Berlin Heidelberg, pp 1–31.
- 625 Schellenberger S, Kolb S, Drake HL. (2009). Metabolic responses of novel cellulolytic and  
626 saccharolytic agricultural soil Bacteria to oxygen. *Environ Microbiol* **12**: 845–861.
- 627 Schmieder R, Edwards R. (2011). Quality control and preprocessing of metagenomic datasets.  
628 *Bioinformatics* **27**: 863–4.
- 629 Smith CJ, Delaune RD. (1984). Influence of the rhizosphere of *Spartina alterniflora* Loisel. On  
630 nitrogen loss from a Louisiana Gulf Coast salt marsh. *Environ Exp Bot* **24**: 91–93.
- 631 Soons MB, Hefting MM, Dorland E, Lamers LPM, Versteeg C, Bobbink R. (2016). Nitrogen effects  
632 on plant species richness in herbaceous communities are more widespread and stronger than those of  
633 phosphorus. *Biol Conserv.* e-pub ahead of print, doi: 10.1016/j.biocon.2016.12.006.
- 634 Torsvik V, Øvreås L. (2002). Microbial diversity and function in soil: from genes to ecosystems.  
635 *Curr Opin Microbiol* **5**: 240–245.
- 636 Tveit AT, Urich T, Frenzel P, Svenning MM. (2015). Metabolic and trophic interactions modulate  
637 methane production by Arctic peat microbiota in response to warming. *Proc Natl Acad Sci U S A*  
638 **112**: E2507-2516.
- 639 Verhoeven J.T., Arheimer, B., Yin, C., & Hefting, M. M. (2006). Regional and global concerns over  
640 wetlands and water quality. *Trends in ecology and evolution*, 21(2), 96-103.
- 641 Wallenstein MD, Myrold DD, Firestone M, Voytek M. (2006). Environmental controls on  
642 denitrifying communities and denitrification rates: Insights from molecular methods. *Ecol Appl* **16**:  
643 2143–2152.
- 644 Whiting GJ, Chanton JP. (1993). Primary production control of methane emission from wetlands.  
645 *Nature* **364**: 794–795.
- 646 Zedler JB, Kercher S. (2005). Wetland resources: status, trends, ecosystem services, and restorability.  
647 *Annu Rev Environ Resour* **30**: 39–74.
- 648



## Nitrogen impacts on microbial function

### 649 **Figures**

#### 650 **Figure 1. CO<sub>2</sub>, CH<sub>4</sub> and N<sub>2</sub>O fluxes.**

651 Greenhouse gas fluxes were measured at a midpoint (T<sub>m</sub>) and final time point (T<sub>f</sub>) during the 90 day  
652 incubation experiment. (A) CO<sub>2</sub> light conditions, (B) CO<sub>2</sub> dark conditions, (C) CH<sub>4</sub> and (D) N<sub>2</sub>O.  
653 Asterisks denote significant differences (p < 0.05).

#### 654 **Figure 2. Microbial community structure and diversity.**

655 (A) Overview of microbial community structure of the initial soil sample (I), *J. acutiflorus*  
656 rhizosphere and bulk soil incubations receiving high or low N input at midpoint (T<sub>m</sub>) and final time  
657 point (T<sub>f</sub>). (B). Principal component analysis of the microbial community members distinguishing  
658 high and low N treatments and midpoint and final sampling time points. Points indicate individual  
659 samples taken. Red dashed arrows indicate environmental and gas fluxes that corresponded variation  
660 in microbial community member's abundance along the respective axis.

#### 661 **Figure 3. A *Juncus acutiflorus* rhizosphere microbial food web model.**

662 In the model of the *J. acutiflorus* rhizosphere, microbial processes are directly (red lines) or indirectly  
663 (black lines) influences by N deposition. *J. acutiflorus* preferentially takes up NH<sub>4</sub><sup>+</sup> which stimulates  
664 plant productivity and rhizodeposition of organic matter and oxygen (Van Diggelen et al., 2015).  
665 Released oxygen and labile organic matter contribute to soil acidification in addition to stimulating  
666 complex polymer degradation (Sphingobacteriales) and heterotrophic denitrifiers (Opitutales). The  
667 production of N<sub>2</sub> can be affected by a drop in pH which influences the activity of complete  
668 denitrifiers. The Group-6 Acidobacteria are outcompeted at higher N availability. Recalcitrant  
669 organic matter degraded by Sphingobacteriales can enter the microbial food web and be fermented by  
670 fermenters that in turn provide substrates for methanogens (*mcr*). The activity of phosphonate lyases  
671 (*phn*) might also stimulate the production of methane while anaerobic methane oxidation also  
672 contributes to methane consumption. Additionally, methane consumption by aerobic methanotrophs

## Nitrogen impacts on microbial function

673 through methane monooxygenases (*pmo*) could be inhibited by excess  $\text{NH}_4^+$  (Dunfield and Knowles  
674 1995).

### 675 **Supplemental Material**

#### 676 **Supplemental Table 1.**

677 Sample overview containing the time of sampling, N load treatment and whether or the sample was  
678 bulk or rhizosphere soil. Additionally, the number of post quality filtered reads that were produced  
679 and the number of OTUs found in each sample. Finally, greenhouse gas fluxes are reported in ( $\mu\text{mol}$   
680  $\text{m}^{-2} \text{d}^{-1}$ ).

#### 681 **Supplemental Table 2.**

682 Plant average dry weight and C:N were determined in different sections of the plant including the  
683 roots, shoots and rhizomes. Biomass weight was determined as dry weight. The mean values from  
684 plants receiving high N and low N are reported (Mean\_High and Mean\_Low). The p-value is  
685 reported as a result of a t-test comparing mean values from high and low N treatments.

#### 686 **Supplemental Table 3.**

687 Metagenome library overview including the time of sampling (Time), number of post-QC reads  
688 (Reads), average length (Avg\_len) and the standard deviation in read length (Sd\_len).

#### 689 **Supplemental Table 4.**

690 Number of reads and contigs assigned to one of three publicly available soil bacterial genomes.

691 Number of reads each metagenome contained are reported as well as the number of contigs that were  
692 assembled that aligned to these genomes.

#### 693 **Supplemental Table 5.**

694 Gene abbreviations.

695

## Nitrogen impacts on microbial function

### 696 **Supplemental Figures**

#### 697 **Supplemental Figure 1.**

698 Experimental design schema depicting sample replicates per treatment in either  
699 rhizosphere/bulk soil. Additionally, the sampling points are denoted by colored boxes.

#### 700 **Supplemental Figure 2.**

701 The Shannon diversity index ( $H'$ ) was calculated for all microbial communities. The Shannon  
702 diversity of all samples was compared from  $T_m$  and  $T_f$  (A). Diversity of experimental groups  
703 (High/Low N + Rhizosphere/Bulk) of all  $T_m$  (B) and  $T_f$  (C) samples were compared using multiple  
704 comparisons

705 **Supplemental Figure 3.** Rarefaction curves with number of species observed as a function of  
706 sequencing effort (sample depth).

#### 707 **Supplemental Figure 4.**

708 Microbial community variation was estimated by calculating the Bray-Curtis dissimilarity for each  
709 sample in a pairwise fashion resulting in a square distance matrix. These pairwise distances were then  
710 reduced to two dimensions using multidimensional scaling. A centroid was calculated for each group  
711 being compared and each sample's Euclidean distance to its respective group centroid was  
712 calculated.  $T_m$  and  $T_f$  were compared in panel A,  $T_m$  (B) and  $T_f$  (C) samples were compared within  
713 respective groups (High/Low N + Rhizosphere/Bulk)

#### 714 **Supplemental Figure 5. Denitrification potential from soil slurries.**

715  $N_2$  and  $N_2O$  production rates were estimated to determine potential denitrification of the soil and  
716 rhizosphere microbial communities.

#### 717 **Supplemental Figure 6. Pore water inorganic nutrients, pH and alkalinity.**

718 Concentration of inorganic nutrients, pH and alkalinity in pore water sampled throughout the  
719 incubation.

720 **Table 1. Correlations of microbial community members to environmental conditions and greenhouse gas fluxes.**  
 721 The mean relative abundance of top bacterial families distinguishing high v low N, rhizosphere v bulk soil or  $T_m$  v  $T_f$  sampling time points  
 722 are indicated as is the t-test result and statistics. Additionally, the top environmental or functional traits correlated with these groups were  
 723 reported along with linear model statistics.

|                                                  | t     | p-value | Mean Relative Abundance |       | Correlate                     | adj R2 | coef      | p-value |
|--------------------------------------------------|-------|---------|-------------------------|-------|-------------------------------|--------|-----------|---------|
|                                                  |       |         | High N                  | Low N |                               |        |           |         |
| <b><i>High versus low N</i></b>                  |       |         |                         |       |                               |        |           |         |
| Opitutales                                       | 4.17  | < 0.001 | 0.040                   | 0.010 | N <sub>2</sub> O              | 0.11   | 3.50E-04  | 0.012   |
| G6-Acidobacteria                                 | -4.22 | < 0.001 | 0.007                   | 0.020 | N <sub>2</sub> O              | 0.19   | -3.18E-05 | 0.058   |
| Sphingobacteriales                               | 2.88  | 0.008   | 0.010                   | 0.005 | N <sub>2</sub> O              | 0.32   | 3.10E-05  | 0.016   |
|                                                  |       |         |                         |       | CO <sub>2</sub> (fixation)    |        |           |         |
| <b><i>Rhizosphere versus bulk</i></b>            |       |         |                         |       |                               |        |           |         |
| Caulobacterales                                  | -3.46 | 0.002   | 0.052                   | 0.032 | NO <sub>3</sub> <sup>-</sup>  | 0.21   | -8.50E-05 | 0.003   |
| <b><i>T<sub>m</sub> versus T<sub>f</sub></i></b> |       |         |                         |       |                               |        |           |         |
| Rhizobiales                                      | 6.66  | < 0.001 | 0.099                   | 0.184 | CO <sub>2</sub> (respiration) | 0.27   | -6.40E-04 | 0.001   |
| Solibacterales                                   | -4.76 | < 0.001 | 0.179                   | 0.116 | Alkalinity                    | 0.26   | -2.00E-02 | 0.002   |

724

725

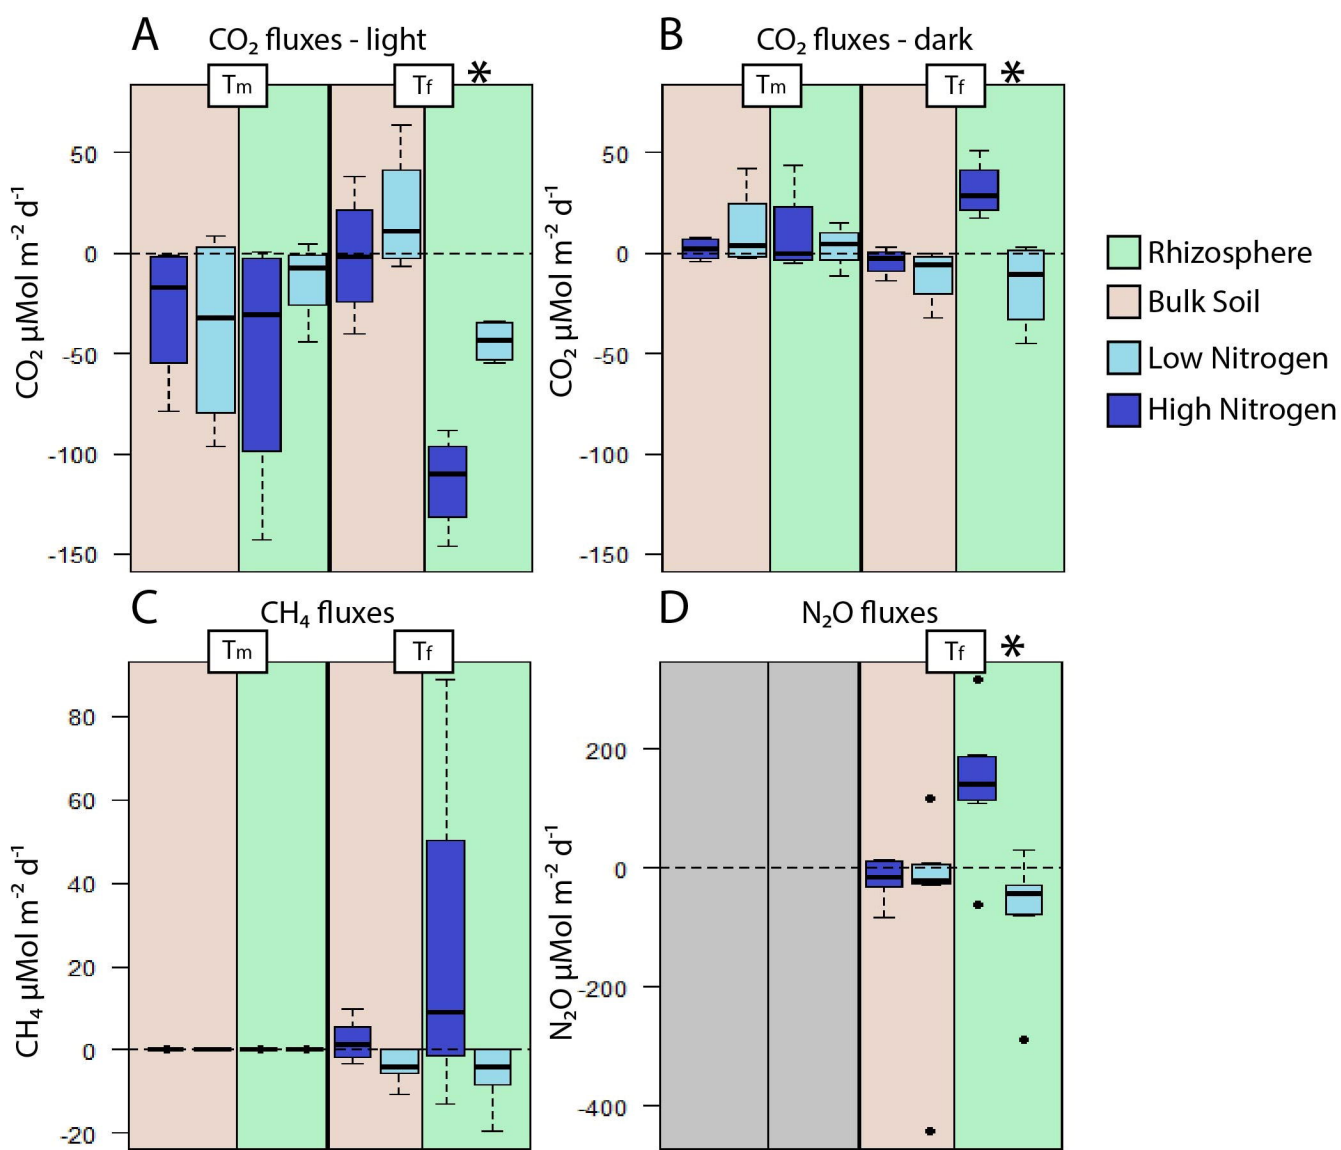

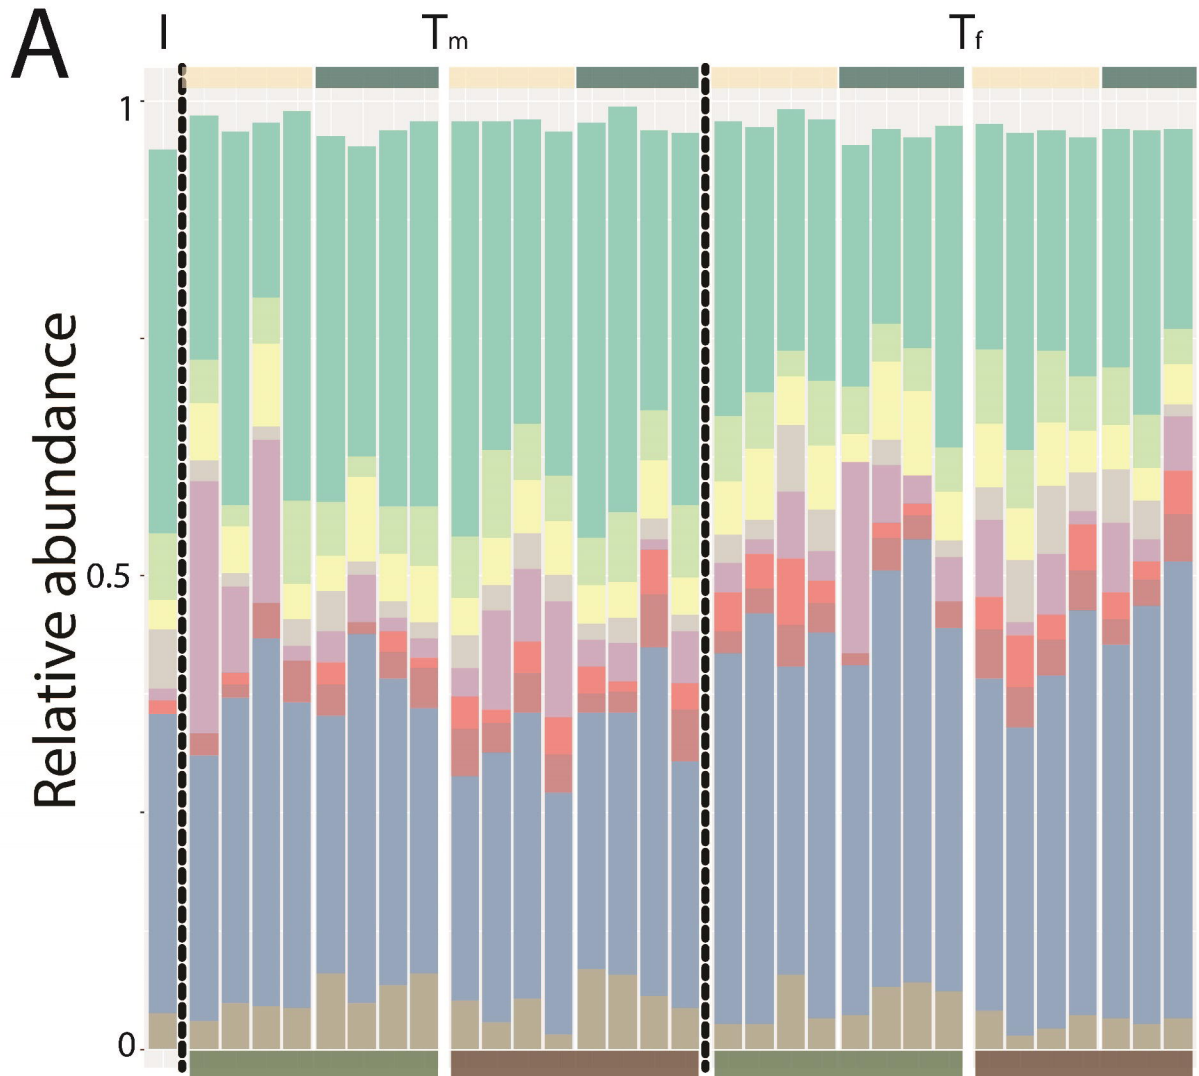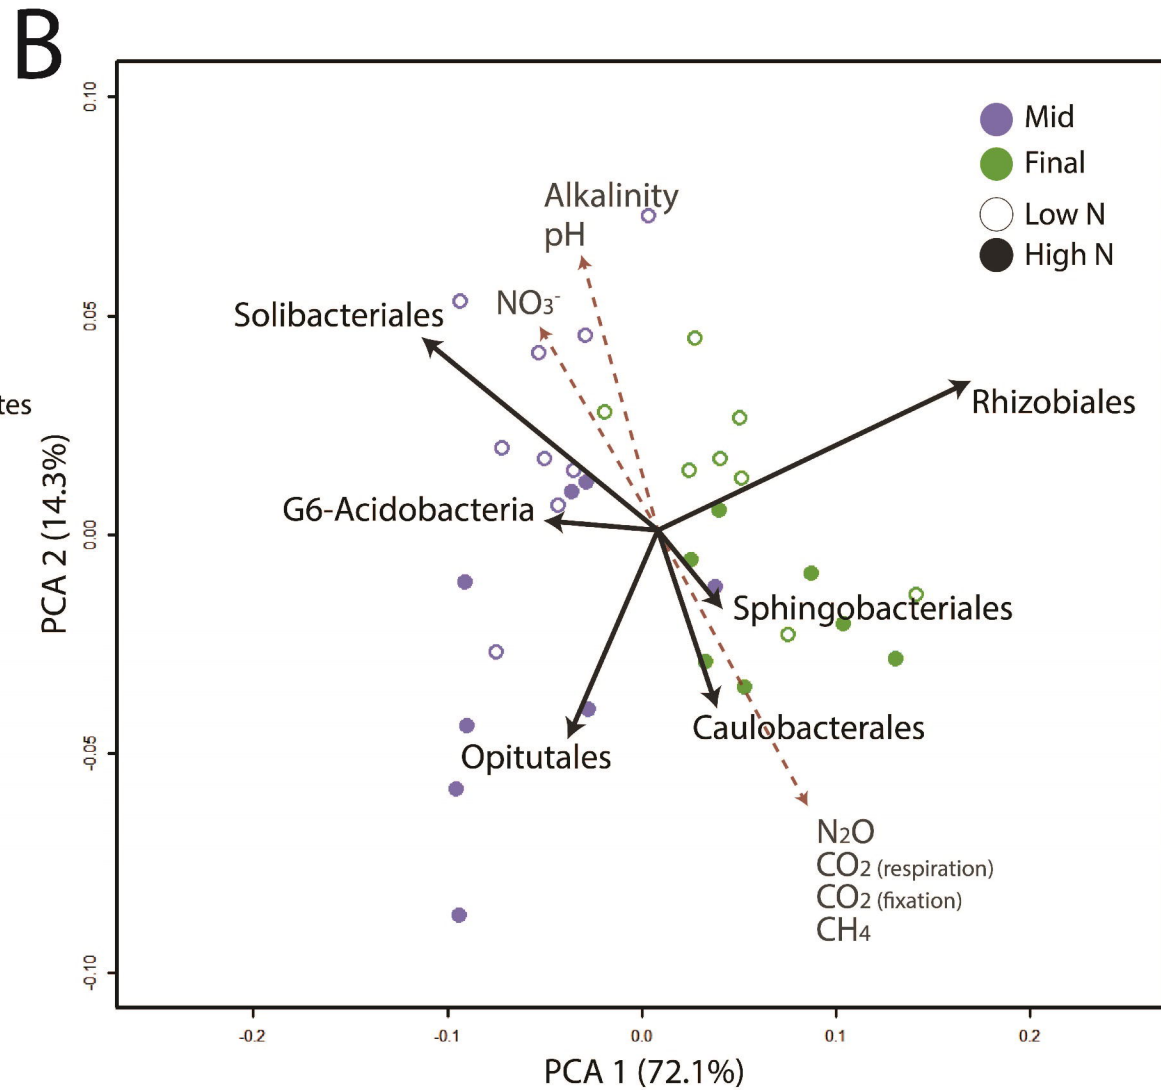

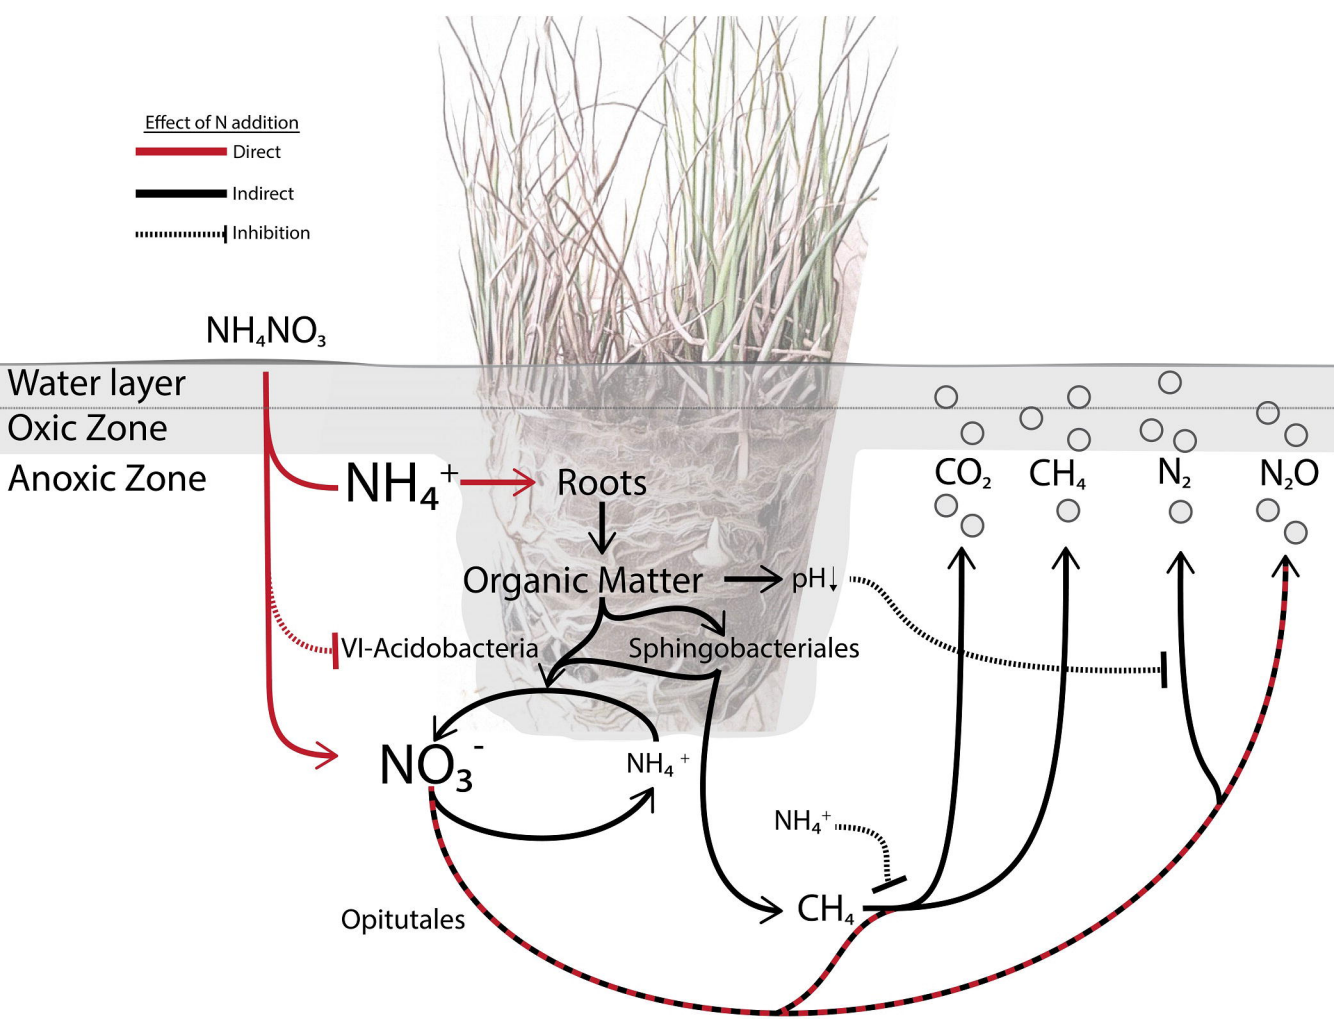

Source: https://www.biorxiv.org/content/10.1101/197855v2.full.pdf
